# Supplementary material for: Reply to: On the role of metal cations in CO2 electrocatalytic reduction
Source: Springer Nature journal article supplement (doi:10.1038/s41929-022-00877-1), 2022-11-28
Supplement: MOESM1 [file 41929_2022_877_MOESM1_ESM.pdf]

Modulation of the selectivity of CO<sub>2</sub> to CO electroreduction in palladium rich Palladium-Indium nanoparticles

*Original*

Modulation of the selectivity of CO<sub>2</sub> to CO electroreduction in palladium rich Palladium-Indium nanoparticles / Pavesi, Davide; Dattila, Federico; Van de Poll, Rim C. J.; Anastasiadou, Dimitra; García-Muelas, Rodrigo; Figueiredo, Marta; Gruter, Gert-Jan M.; López, Núria; Koper, Marc T. M.; Schouten, Klaas Jan P.. - In: JOURNAL OF CATALYSIS. - ISSN 0021-9517. - 402:(2021), pp. 229-237. [10.1016/j.jcat.2021.08.021]

*Availability:*

This version is available at: 11583/2981904 since: 2023-09-11T08:35:47Z

*Publisher:*

Elsevier

*Published*

DOI:10.1016/j.jcat.2021.08.021

*Terms of use:*

This article is made available under terms and conditions as specified in the corresponding bibliographic description in the repository

*Publisher copyright*

Elsevier postprint/Author's Accepted Manuscript

© 2021. This manuscript version is made available under the CC-BY-NC-ND 4.0 license  
<http://creativecommons.org/licenses/by-nc-nd/4.0/>. The final authenticated version is available online at:  
<http://dx.doi.org/10.1016/j.jcat.2021.08.021>

(Article begins on next page)

# 1 Reply to: “On the role of metal cations in CO<sub>2</sub> electroreduction reduction”

2  
3 Federico Dattila<sup>1</sup>, Mariana C. O. Monteiro<sup>2,3</sup>, Marc T. M. Koper<sup>3\*</sup> and Núria López<sup>4\*</sup>

4 <sup>1</sup> Department of Applied Science and Technology (DISAT), Politecnico di Torino, Corso Duca  
5 degli Abruzzi 24, 10129 Turin, Italy

6 <sup>2</sup> Fritz Haber Institute of the Max Planck Society, Faradayweg 4-6, 14195 Berlin, Germany

7 <sup>3</sup> Leiden Institute of Chemistry, Leiden University, 2300 RA Leiden, The Netherlands

8 <sup>4</sup> Institute of Chemical Research of Catalonia (ICIQ), The Barcelona Institute of Science and  
9 Technology (BIST), 43007 Tarragona, Spain

## 10 11 Supplementary Information

### 12 Supplementary Methods

13 Density functional theory (DFT) simulations were carried out through the Vienna Ab Initio  
14 Simulation Package(VASP).<sup>1,2</sup> We chose the PBE density functional (ref 3) including dispersion  
15 through the DFT-D2 method,<sup>4,5</sup> with our reparametrized C<sub>6</sub> coefficients.<sup>6</sup> Inner electrons were  
16 represented by PAW pseudopotentials<sup>7,8</sup> and the mono-electronic states for the valence electrons  
17 were expanded as plane waves with a kinetic energy cutoff of 450 eV. We employed a 4-layer  
18 thick Au(111) (3×3) supercell, with the two innermost Au layers fixed to mimic the bulk and 3  
19 H<sub>2</sub>O molecules within the solvation layer. A vacuum thickness of around 8 Å vacuum was included  
20 beyond the outermost H<sub>2</sub>O molecule. A K<sup>+</sup> was inserted within the solvation layer to assess the  
21 “with metal cation” case (see Fig.1a), while no cation was present in the system “without metal  
22 cation” (Fig. 1c). To model the case “with metal cation” but “no excess electron”, we removed one  
23 hydrogen from one H<sub>2</sub>O molecule (Fig. 1b), leading to a charge balanced cell with one K<sup>+</sup> and one  
24 OH<sup>-</sup>. To compute activation angle  $\alpha$  (Fig. 1d,e) and Bader charge  $q$  (Fig. 1f,g) of the CO<sub>2</sub> unit, we  
25 carried out a ionic optimization of the overall system: Au surface, H<sub>2</sub>O molecules, cation (if  
26 present), and a CO<sub>2</sub> molecule initially adsorbed on the surface and let free to move. Since K<sup>+</sup>, CO<sub>2</sub>,  
27 and the explicit solvation layer were placed only on one side of the slab, we applied an additional  
28 dipole correction to remove spurious contributions arising from the asymmetric slab model.<sup>9</sup>

29 To assess the role of explicit electrostatic effects on CO<sub>2</sub> activation, we applied different intensities  
30 of electric field ( $\vec{E}_{EDL}$ ) through a dipole correction (refs. 6,10):  $-0.2 \text{ V \AA}^{-1}$ ,  $-0.4 \text{ V \AA}^{-1}$ ,  $-0.6 \text{ V \AA}^{-1}$   
31 <sup>1</sup>. Considering a potential of zero charge ( $U_{PZC}$ ) for polycrystalline gold of +0.2 V vs SHE (ref.  
32 13) and an electrical double layer thickness ( $d_{EDL}$ ) of 3 Å,<sup>11,12</sup> such electric field intensities  
33 correspond roughly to values of electric potential of  $-0.4 \text{ V vs. SHE}$ ,  $-1.0 \text{ V vs. SHE}$ , and  $-1.6 \text{ V}$   
34  $\text{vs. SHE}$  respectively, Supporting Equation 1.

$$35 \quad U \text{ (vs. SHE)} = U_{PZC} + \vec{E}_{EDL} \cdot d_{EDL} \quad (1)$$

## 36 Supplementary References

- 37 1. Kresse, G. & Furthmüller, J. Efficient iterative schemes for ab initio total-energy  
38 calculations using a plane-wave basis set. *Phys. Rev. B* **54**, 11169–11186 (1996).
- 39 2. Kresse, G. & Furthmüller, J. Efficiency of ab-initio total energy calculations for metals and  
40 semiconductors using a plane-wave basis set. *Comput. Mater. Sci.* **6**, 15–50 (1996).
- 41 3. Perdew, J. P., Burke, K. & Ernzerhof, M. Generalized gradient approximation made simple.  
42 *Phys. Rev. Lett.* **77**, 3865–3868 (1996).
- 43 4. Grimme, S. Semiempirical GGA-type density functional constructed with a long-range  
44 dispersion correction. *J. Comput. Chem.* **27**, 1787–1799 (2006).
- 45 5. Bucko, T. *et al.* Improved description of the structure of molecular and layered crystals: Ab  
46 initio DFT calculations with van der Waals corrections. *J. Phys. Chem. A* **114**, 11814–11824  
47 (2010).
- 48 6. Almora-Barrios, N., Carchini, G., Błoński, P. & López, N. Costless derivation of dispersion  
49 coefficients for metal surfaces. *J. Chem. Theory Comput.* **10**, 5002–5009 (2014).
- 50 7. Blöchl, P. E. Projector augmented-wave method. *Phys. Rev. B* **50**, 17953–17979 (1994).
- 51 8. Kresse, G. & Joubert, D. From ultrasoft pseudopotentials to the projector augmented-wave  
52 method. *Phys. Rev. B* **59**, 1758–1775 (1999).
- 53 9. Makov, G. & Payne, M. C. Periodic boundary conditions in ab initio calculations. *Phys.*  
54 *Rev. B* **51**, 4014–4022 (1995).
- 55 10. Feibelman, P. J. Surface-diffusion mechanism versus electric field: Pt/Pt(001). *Phys. Rev.*  
56 *B - Condens. Matter Mater. Phys.* **64**, 125403 (2001).
- 57 11. McCrum, I. T., Bondue, C. J. & Koper, M. T. M. Hydrogen-induced step-edge roughening  
58 of platinum electrode surfaces. *J. Phys. Chem. Lett.* **10**, 6842–6849 (2019).
- 59 12. Chen, L. D., Urushihara, M., Chan, K. & Nørskov, J. K. Electric Field Effects in  
60 Electrochemical CO<sub>2</sub> Reduction. *ACS Catal.* **6**, 7133–7139 (2016).
- 61 13. White, R. E., Bockris, J. O. & Conway, B. E. *Modern aspects of electrochemistry*. (Kluwer  
62 Academic Publishers, 2002).

63
